# Supplementary material
Source: Springer Nature journal article supplement (https://www.springermedizin.de/resource/supplementary/12883_2013_993_MOESM3_ESM.pdf/9456570)
Supplement: MOESM3 [file 9456570]

## Baseline

## Follow-up

Baseline assesment, including:

- Medical history
- Clinical evaluation
- Questionnaires on acute trigger factors

6 weeks  
Baseline neuropsychological assessment, including:

- Cognitive tests
- Mood and functional outcome
- Fatigue, quality of life and health status

0.5 y FU

- Vascular events
- Post-stroke epilepsy
- Functional outcome
- Risk factors

1 y FU

- Vascular events
- Post-stroke epilepsy
- Functional outcome
- Risk factors

1 year  
Follow-up neuropsychological assessment, including:

- Cognitive tests
- Mood and functional outcome
- Fatigue, quality of life and health status

1.5 y FU

- Vascular events
- Post-stroke epilepsy
- Functional outcome
- Risk factors

2 y FU

- Vascular events
- Post-stroke epilepsy
- Functional outcome
- Risk factors

2.5 y FU

- Vascular events
- Post-stroke epilepsy
- Functional outcome
- Risk factors

3 y FU

- Vascular events
- Post-stroke epilepsy
- Functional outcome
- Risk factors
